# Supplementary material for: Artificial intelligence predicts the immunogenic landscape of SARS-CoV-2 leading to universal blueprints for vaccine designs
Source: PubMed Central journal article supplement (PMC7758335; doi:10.1038/s41598-020-78758-5), 2020-12-23
Supplement: 41598_2020_78758_MOESM2_ESM.pdf [file 41598_2020_78758_MOESM2_ESM.pdf]

## Artificial intelligence predicts the immunogenic landscape of SARS-CoV-2 leading to universal blueprints for vaccine designs

Brandon Malone\*<sup>2</sup>, Boris Simovski\*<sup>1</sup>, Clément Moliné\*<sup>1</sup>, Jun Cheng<sup>2</sup>, Marius Gheorghe<sup>1</sup>, Hugues Fontenelle<sup>1</sup>, Ioannis Vardaxis<sup>1</sup>, Simen Tennøe<sup>1</sup>, Jenny-Ann Malmberg<sup>1</sup>, Richard Stratford<sup>1</sup>, Trevor Clancy<sup>1</sup>

<sup>1</sup>NEC OncoImmunity AS, Oslo Cancer Cluster, Ullernchausseen 64/66, 0379 Oslo, Norway

<sup>2</sup>NEC Laboratories Europe GmbH Kurfuersten-Anlage 36, 69115 Heidelberg, Germany

<sup>†</sup>These authors contributed equally

\*Corresponding author (Email: trevor@oncoimmunity.com)

**Supplementary Table 2:** The number of total observed individuals (complete haplotypes) and the number of unique haplotypes observed in each region.

| Region                    | Number of individuals | Number of unique haplotypes |
|---------------------------|-----------------------|-----------------------------|
| Europe                    | 1393                  | 1308                        |
| North America             | 1075                  | 1010                        |
| North-East Asia           | 104                   | 100                         |
| Oceania                   | 197                   | 117                         |
| South Asia                | 3035                  | 2946                        |
| South and Central America | 2904                  | 2791                        |
| South-East Asia           | 13071                 | 9592                        |
| Sub-Saharan Africa        | 401                   | 398                         |
| Western Asia              | 157                   | 157                         |
